# Supplementary material
Source: PubMed Central journal article supplement (PMC3887516)

A)

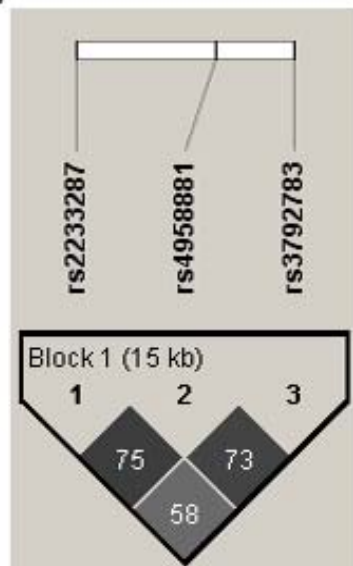

B)

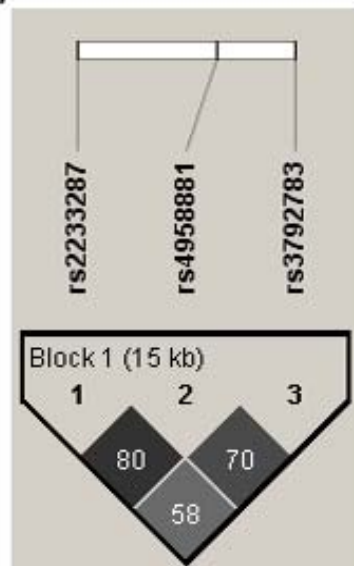

C)

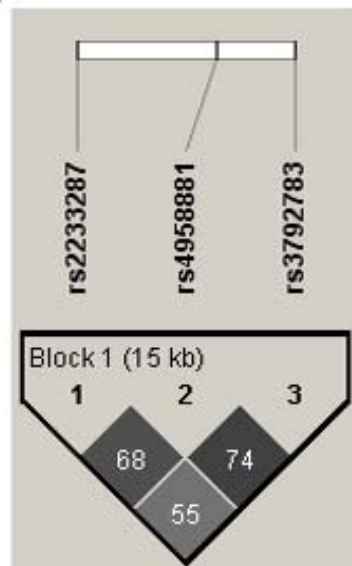

D)

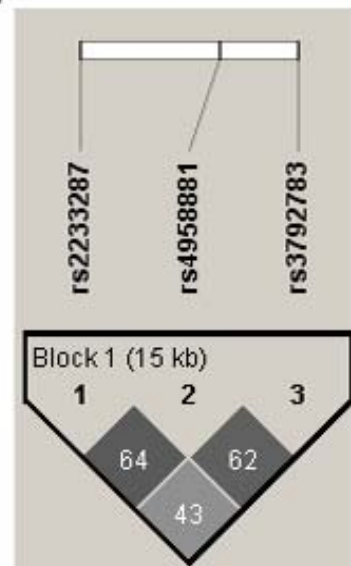

E)

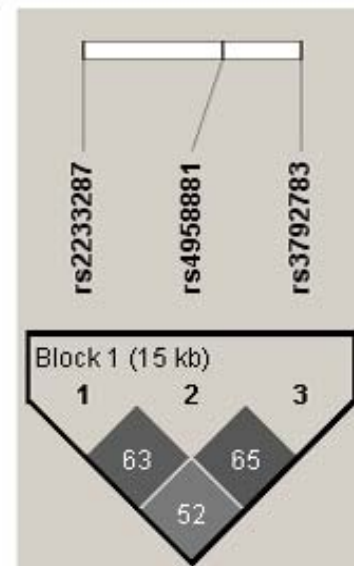

F)

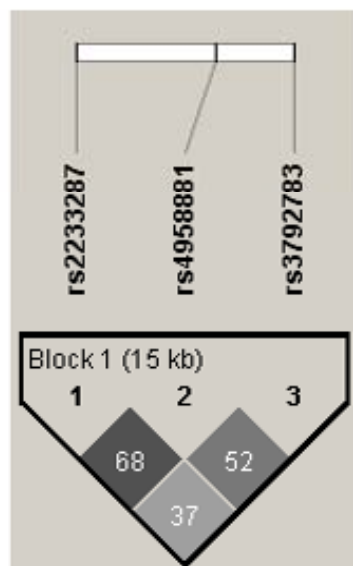

G)

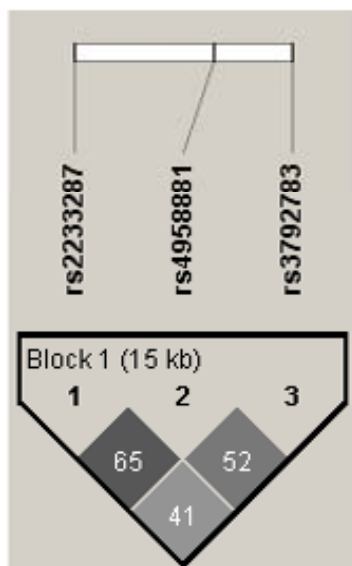

H)

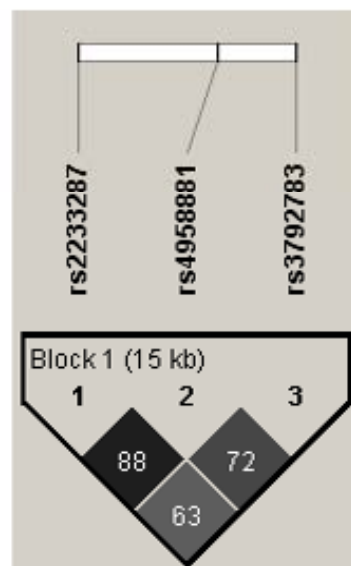

I)\*

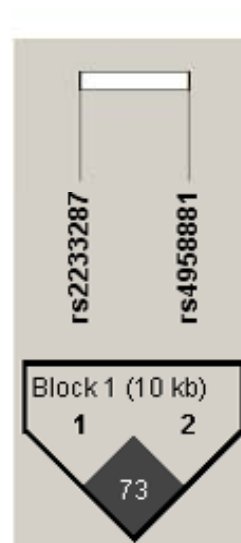

J)

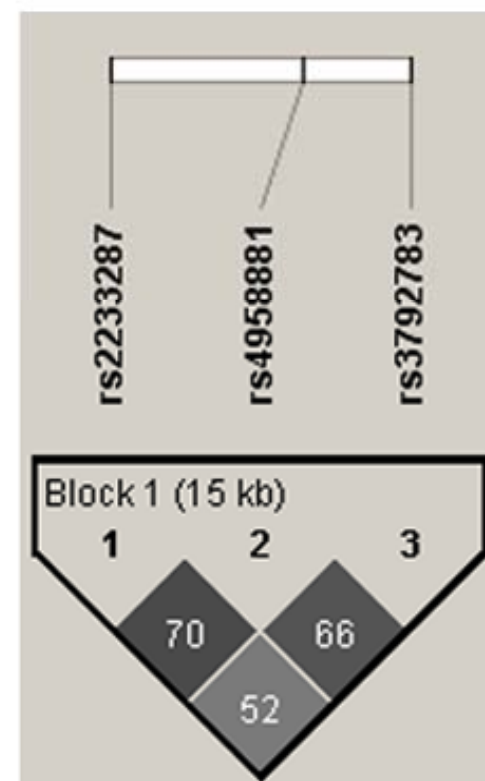

Supplement: NIHMS541717-supplement-Supp_2.pdf [file NIHMS541717-supplement-Supp_2.pdf]

A)

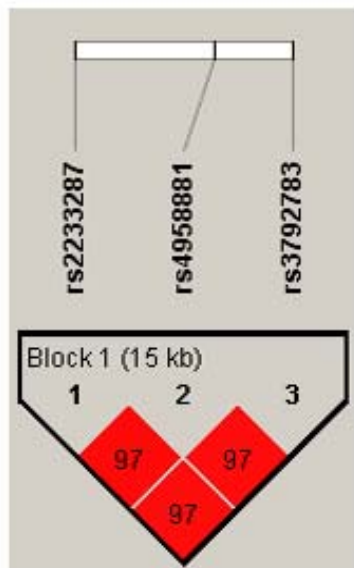

B)

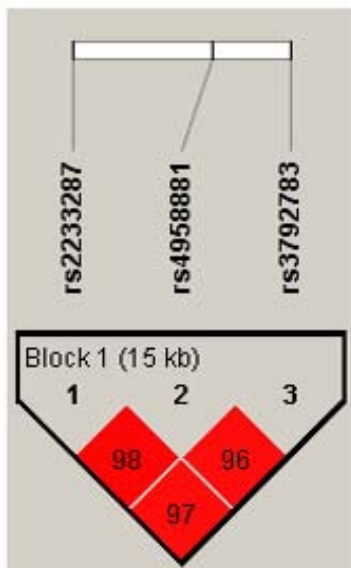

C)

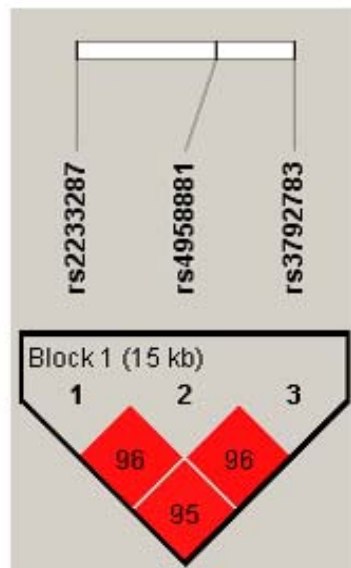

D)

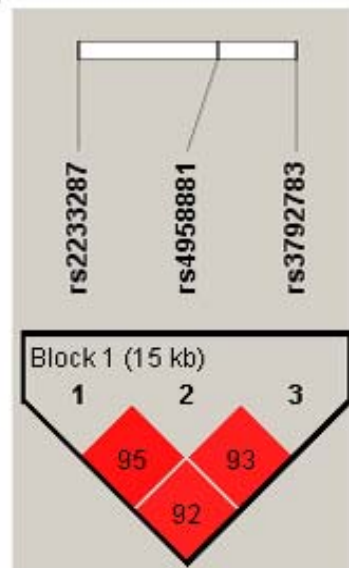

E)

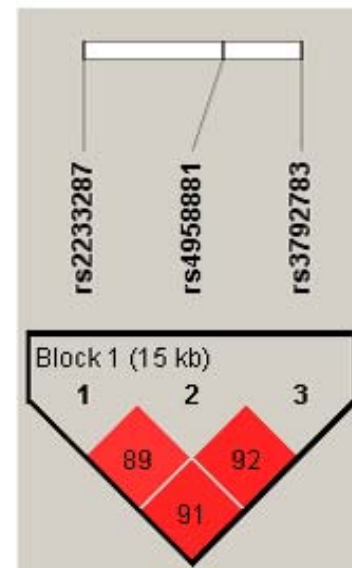

F)

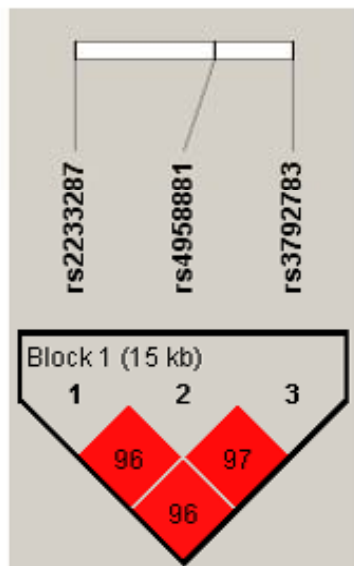

G)

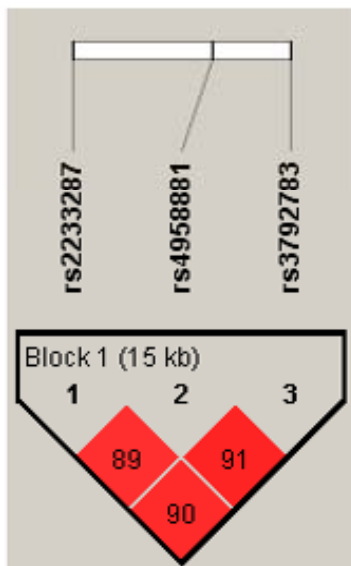

H)

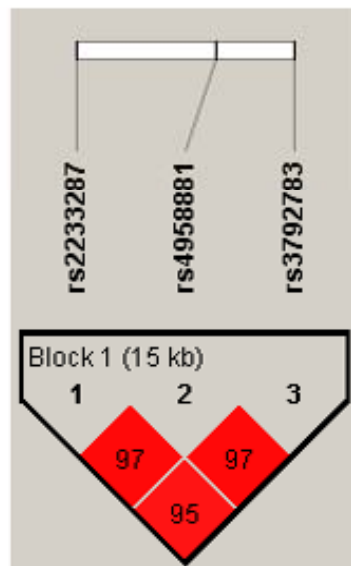

I)\*

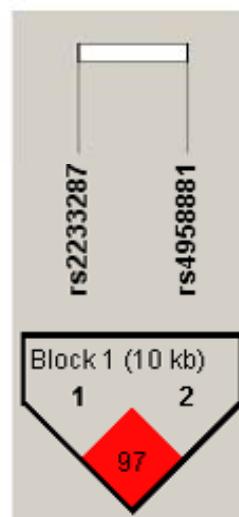

J)

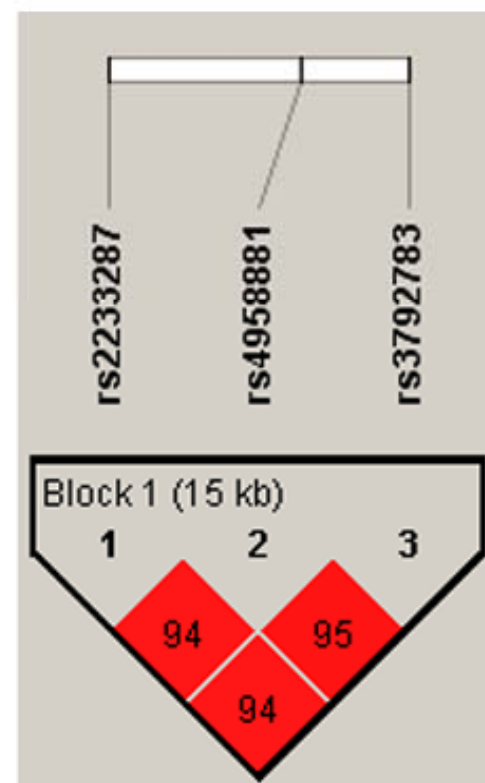

Supplement: NIHMS541717-supplement-Supp_3.pdf [file NIHMS541717-supplement-Supp_3.pdf]
